# Supplementary material for: Aeroallergens in Canada: Distribution, Public Health Impacts, and Opportunities for Prevention
Source: PubMed Central journal article supplement (PMC6121311; doi:10.3390/ijerph15081577), 2018-07-25
Supplement: ijerph-15-01577-s001.pdf [file ijerph-15-01577-s001.pdf]

**Table S1. Plant-Derived Aeroallergens in the Major Floristic Zones of Canada**

| Floristic Zone                                                                                                                      | Trees             |                                | Grasses and Weeds              |                                   |
|-------------------------------------------------------------------------------------------------------------------------------------|-------------------|--------------------------------|--------------------------------|-----------------------------------|
|                                                                                                                                     | Common Name       | Genus                          | Common Name                    | Genus                             |
| <u>Northwest Coastal:</u><br>Southwestern British Columbia (BC)                                                                     | Cedar             | <i>Juniperus</i>               | Rye & Orchard grass            | <i>Lolium &amp; Dactylis</i>      |
|                                                                                                                                     | Fir               | <i>Abies</i>                   | Fescue grass                   | <i>Festuca</i>                    |
|                                                                                                                                     | Pine              | <i>Pinus</i>                   | Brome/chess grass              | <i>Bromus</i>                     |
|                                                                                                                                     | Alder             | <i>Alnus</i>                   | Timothy & velvet grass         | <i>Phleum &amp; Holcus</i>        |
|                                                                                                                                     | Birch             | <i>Betula</i>                  | Sweet grass                    | <i>Anthoxanthum</i>               |
|                                                                                                                                     | Hazel             | <i>Corylus</i>                 | Plantain & Amaranths           | <i>Plantago &amp; Amaranthus</i>  |
|                                                                                                                                     | Oak               | <i>Quercus</i>                 | Short ragweed                  | <i>Ambrosia</i>                   |
|                                                                                                                                     | Cypress           | <i>Cupressaceae</i>            | Chenopods & Orach              | <i>Kochia &amp; Atriplex</i>      |
| <hr/>                                                                                                                               |                   |                                |                                |                                   |
| <u>Northern Forest :</u>                                                                                                            |                   |                                |                                |                                   |
| Yukon, NWT,<br>Nunavut,<br>Newfoundland and<br>Labrador, Northern<br>BC, Alberta,<br>Manitoba, Ontario &<br>Quebec                  | Juniper           | <i>Juniperus</i>               | Mugwort                        | <i>Artemisia</i>                  |
|                                                                                                                                     | Cedar & Birch     | <i>Cedrus &amp; Betula</i>     | Nettle                         | <i>Urtica</i>                     |
|                                                                                                                                     | Pine & Fir        | <i>Pinus &amp; Abies</i>       | Chenopods                      | <i>Chenopodium &amp; Kochia</i>   |
|                                                                                                                                     | Alder & Aspen     | <i>Alnus &amp; Populus</i>     | Pigweeds                       | <i>Amaranthus</i>                 |
|                                                                                                                                     | Willow & Maple    | <i>Salix &amp; Acer</i>        | Pasture grasses ( <i>low</i> ) |                                   |
| <hr/>                                                                                                                               |                   |                                |                                |                                   |
| <u>Rocky Mountain:</u><br>Southeastern BC,<br>Southern Alberta                                                                      | Mountain cedar    | <i>Juniperus</i>               | Rye & Orchard grass            | <i>Lolium &amp; Dactylis</i>      |
|                                                                                                                                     | Pine              | <i>Pinus</i>                   | Fescue grass                   | <i>Festuca</i>                    |
|                                                                                                                                     | Aspen/Cottonwood  | <i>Populus</i>                 | Timothy & Chess grass          | <i>Bromus &amp; Phleum</i>        |
|                                                                                                                                     | Willow            | <i>Salix</i>                   | Tumbleweeds                    | <i>Kochia &amp; Salsol</i>        |
|                                                                                                                                     | Maple/Boxelder    | <i>Acer</i>                    | Pigweed                        | <i>Amaranthus</i>                 |
|                                                                                                                                     | Oak               | <i>Quercus</i>                 | Dock & Sage                    | <i>Rumex &amp; Artemisia</i>      |
| <hr/>                                                                                                                               |                   |                                |                                |                                   |
| <u>Central Plains:</u><br>Southern Alberta,<br>Saskatchewan and<br>Manitoba                                                         | Ash               | <i>Fraxinus</i>                | Giant/western ragweed          | <i>Ambrosia</i>                   |
|                                                                                                                                     | Red cedar         | <i>Juniperus</i>               | Rye & Orchard grass            | <i>Lolium &amp; Dactylis</i>      |
|                                                                                                                                     | Pine & Beech      | <i>Pinus &amp; Fagus</i>       | Fescue grass                   | <i>Festuca</i>                    |
|                                                                                                                                     | Red/white oak     | <i>Quercus</i>                 | Timothy & chess grass          | <i>Phleum &amp; Bromus</i>        |
|                                                                                                                                     | Elm & Ash         | <i>Ulmus &amp; Fraxinus</i>    | Sweet grass                    | <i>Anthoxanthum</i>               |
|                                                                                                                                     | Maple/Box elder   | <i>Acer</i>                    | Short/giant ragweed            | <i>Ambrosia</i>                   |
|                                                                                                                                     | Alder & Birch     | <i>Alnus &amp; Betula</i>      | Mugwort                        | <i>Artemisia</i>                  |
|                                                                                                                                     | Walnut & Pecan    | <i>Juglans</i>                 | Pigweed                        | <i>Amaranthus</i>                 |
|                                                                                                                                     | Locust & Hawthorn | <i>Robinia &amp; Crataegus</i> | Lamb's quarter                 | <i>Chenopodium</i>                |
|                                                                                                                                     | Cottonwood        | <i>Populus</i>                 | Nettle & Dock/sorrel           | <i>Urtica &amp; Rumex</i>         |
|                                                                                                                                     | Willow & Locust   | <i>Salix &amp; Robina</i>      | Plantain & Chenopods           | <i>Plantago &amp; Kochia</i>      |
| <hr/>                                                                                                                               |                   |                                |                                |                                   |
| <u>Eastern<br/>Agricultural:</u><br>Southern Ontario,<br>Southern Quebec,<br>New Brunswick,<br>Nova Scotia, Prince<br>Edward Island | Sycamore&Hickory  | <i>Plantanus &amp; Carya</i>   | Pigweed & Waterhemp            | <i>Amaranthus &amp; Ancida</i>    |
|                                                                                                                                     | Cedar & Pine      | <i>Juniperus &amp; Pinus</i>   | Rye & Orchard grass            | <i>Lolium &amp; Dactylis</i>      |
|                                                                                                                                     | Oak & Beech       | <i>Quercus &amp; Fagus</i>     | Fescue & chess grass           | <i>Festuca &amp; Bromus</i>       |
|                                                                                                                                     | Elm & Ash         | <i>Ulmus &amp; Fraxinus</i>    | Timothy & Sweet grass          | <i>Phleum &amp; Anthoxanthum</i>  |
|                                                                                                                                     | Sycamore          | <i>Plantanus</i>               | Short/giant ragweed            | <i>Ambrosia</i>                   |
|                                                                                                                                     | Maple & Cypress   | <i>Acer &amp; Cupressaceae</i> | Mugwort & Pigweed              | <i>Artemisia &amp; Amaranthus</i> |
|                                                                                                                                     | Alder & Birch     | <i>Alnus &amp; Betula</i>      | Lamb's quarter                 | <i>Chenopodium</i>                |
|                                                                                                                                     | Hickory & Locust  | <i>Carya &amp; Robinia</i>     | Dock & sorrel                  | <i>Rumex</i>                      |
| <hr/>                                                                                                                               |                   |                                |                                |                                   |
| Hawthorn                                                                                                                            | <i>Crataegus</i>  | Plantain & Nettle              | <i>Plantago &amp; Urtica</i>   |                                   |
| Walnut & Pecan                                                                                                                      | <i>Juglans</i>    |                                |                                |                                   |

Adapted from [14].
